# Supplementary material for: A photoluminescence biosensor for the detection of N-acyl homoserine lactone using cysteamine functionalized ZnO nanoparticles for the early diagnosis of urinary tract infections
Source: Royal Society of Chemistry journal article supplement (doi:10.1039/c9tb02243k), 2020-01-01
Supplement: c9tb02243k1.pdf [file c9tb02243k1.pdf]

**Photoluminescence Biosensor for the Detection of *N*-Acyl Homoserine Lactone using  
Cysteamine functionalized ZnO Nanoparticles for the Early Diagnosis of Urinary Tract Infection**

Sahana Vasudevan<sup>a</sup>, Parthasarathy Srinivasan<sup>b</sup>, John Bosco Balaguru Rayappan<sup>b\*</sup>  
and Adline Princy Solomon<sup>a\*</sup>

**Table S1** Components of Artificial Urine Media<sup>1</sup>

| S.No. | Component                            | Quantity (g/L) |
|-------|--------------------------------------|----------------|
| 1.    | Peptone                              | 1              |
| 2.    | Yeast Extract                        | 0.005          |
| 3.    | Lactic Acid                          | 0.1            |
| 4.    | Citric Acid                          | 0.4            |
| 5.    | Sodium Bicarbonate                   | 2.1            |
| 6.    | Urea                                 | 10             |
| 7.    | Uric Acid                            | 0.07           |
| 8.    | Creatinine                           | 0.8            |
| 9.    | Calcium Chloride.2H <sub>2</sub> O   | 0.37           |
| 10.   | Sodium chloride                      | 5.2            |
| 11.   | Iron II sulphate.7H <sub>2</sub> O   | 0.0012         |
| 12.   | Magnesium Sulphate.7H <sub>2</sub> O | 0.49           |
| 13.   | Sodium Sulphate.10H <sub>2</sub> O   | 1.6            |
| 14.   | Potassium-Di-hydrogen Phosphate      | 0.95           |
| 15.   | Di-potassium hydrogen phosphate      | 1.2            |
| 16.   | Ammonium Chloride                    | 1.3            |

Fig. S1:

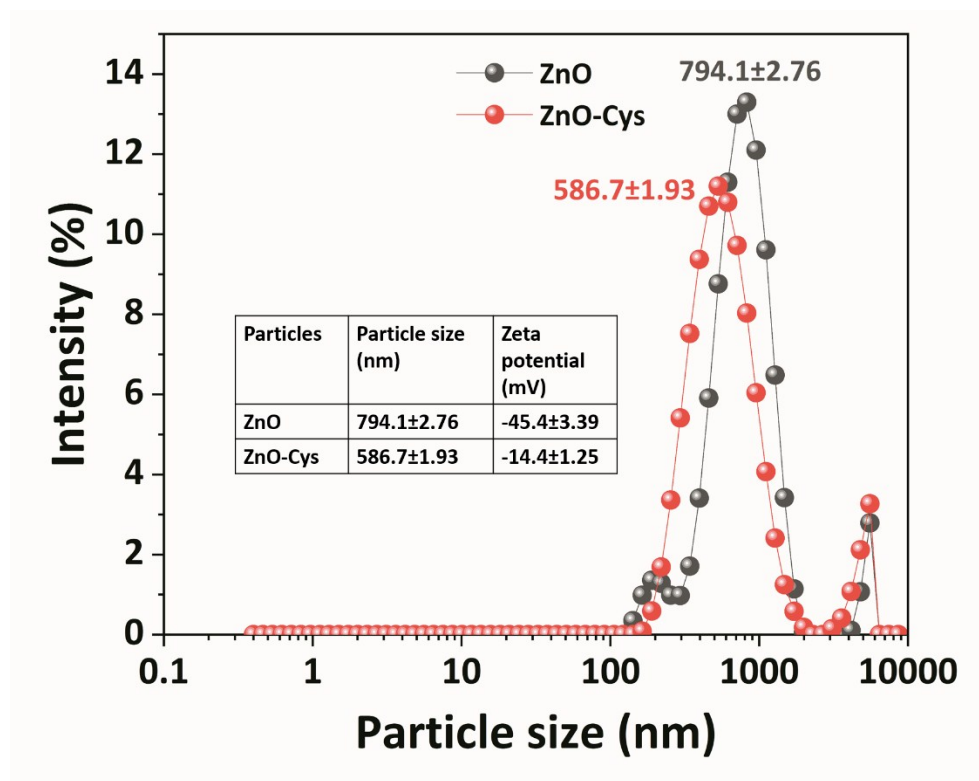

Fig. S1. The particle size of the ZnO and ZnO-Cys system measured from zeta-sizer.

Fig. S2:

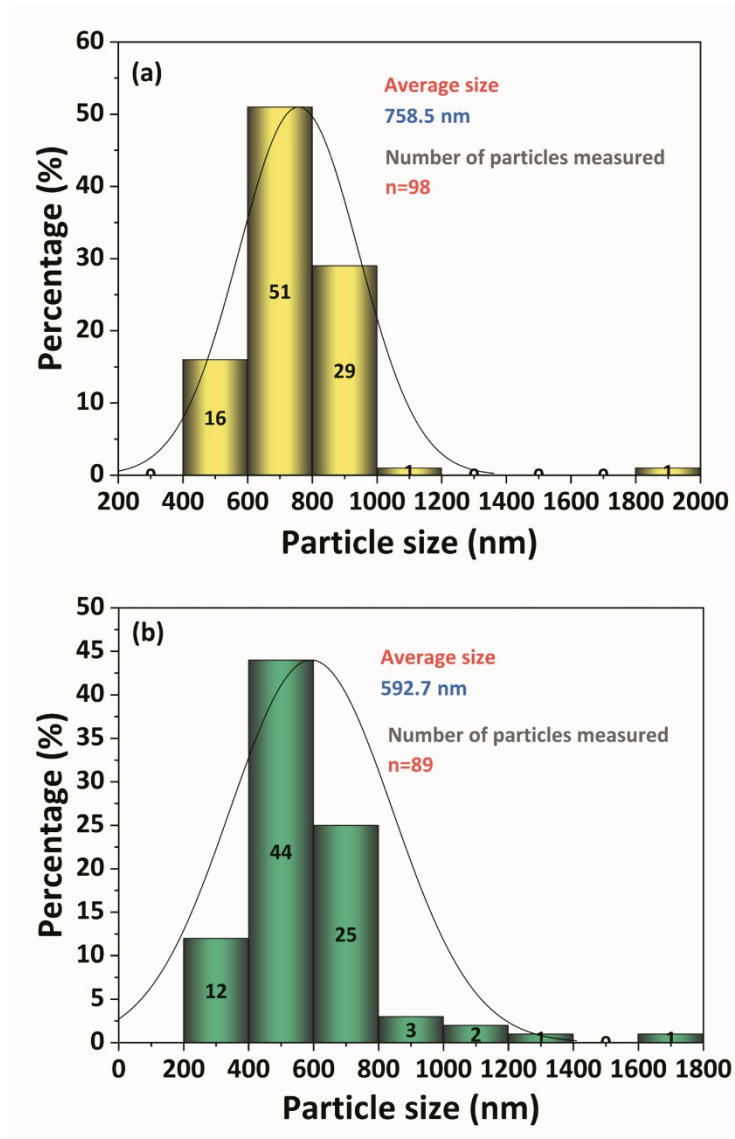

Fig. S2. Histogram plot representing the particle size of the (a) ZnO and (b) ZnO-Cys system measured from SEM images using ImageJ software .

References:

- 1 T. Brooks and C. W. Keevil, *Lett. Appl. Microbiol.*, 1997, **24**, 203–206.
